# Supplementary material for: Fine particulate air pollution estimation in Ouagadougou using satellite aerosol optical depth and meteorological parameters
Source: Royal Society of Chemistry journal article supplement (doi:10.1039/d4ea00057a), 2024-01-01
Supplement: d4ea00057a1.pdf [file d4ea00057a1.pdf]

## Supplementary information

### Fine particulate air pollution estimation in Ouagadougou using satellite aerosol optical depth and meteorological parameters

Joe Adabouk Amooli<sup>a,b</sup>, Daniel M Westervelt<sup>\*b</sup>, Kwame Oppong Hackman<sup>c</sup>, Bernard Nana<sup>d</sup>

**Table S1:** % values of data availability of PM<sub>2.5</sub> from the embassy dataset for the measurement periods

| Month     | % of Data Availability |
|-----------|------------------------|
| Jan       | 65                     |
| Feb       | 100                    |
| March     | 100                    |
| April     | 100                    |
| May       | 100                    |
| June      | 20                     |
| July      | 14                     |
| August    | 86                     |
| September | 100                    |
| October   | 17                     |
| November  | 53                     |
| December  | 65                     |

**Table S2:** % values of data availability of satellite AOD over the data collection period.

| Year | % of Data Availability | Year | % of Data Availability |
|------|------------------------|------|------------------------|
| 2000 | 45                     | 2012 | 60                     |
| 2001 | 46                     | 2013 | 61                     |
| 2002 | 50                     | 2014 | 56                     |
| 2003 | 58                     | 2015 | 63                     |
| 2004 | 60                     | 2016 | 58                     |
| 2005 | 59                     | 2017 | 62                     |
| 2006 | 61                     | 2018 | 56                     |
| 2007 | 55                     | 2019 | 55                     |
| 2008 | 58                     | 2020 | 58                     |
| 2009 | 59                     | 2021 | 63                     |
| 2010 | 57                     | 2022 | 57                     |
| 2011 | 59                     |      |                        |

**Table S3:** Pearson correlation coefficients between observed and satellite weather parameters at Ouagadougou International Airport

| Parameters                                                                               | Dry season<br>r | Rainy Season<br>r |
|------------------------------------------------------------------------------------------|-----------------|-------------------|
| Observed precipitation and CHIRPS precipitation (resampled to 1km resolution)            | 0.83            | 0.79              |
| Observed relative humidity and Era5-Land relative humidity (resampled to 1km resolution) | 0.87            | 0.89              |
| Observed temperature and Era5-Land surface                                               | 0.97            | 0.84              |

---

temperature

Observed wind speed and Era5-Land wind speed  
(resampled to 1km resolution)

0.90

0.88

Observed wind direction and Era5-Land wind  
direction (resampled to 1km resolution)

0.85

0.81

---

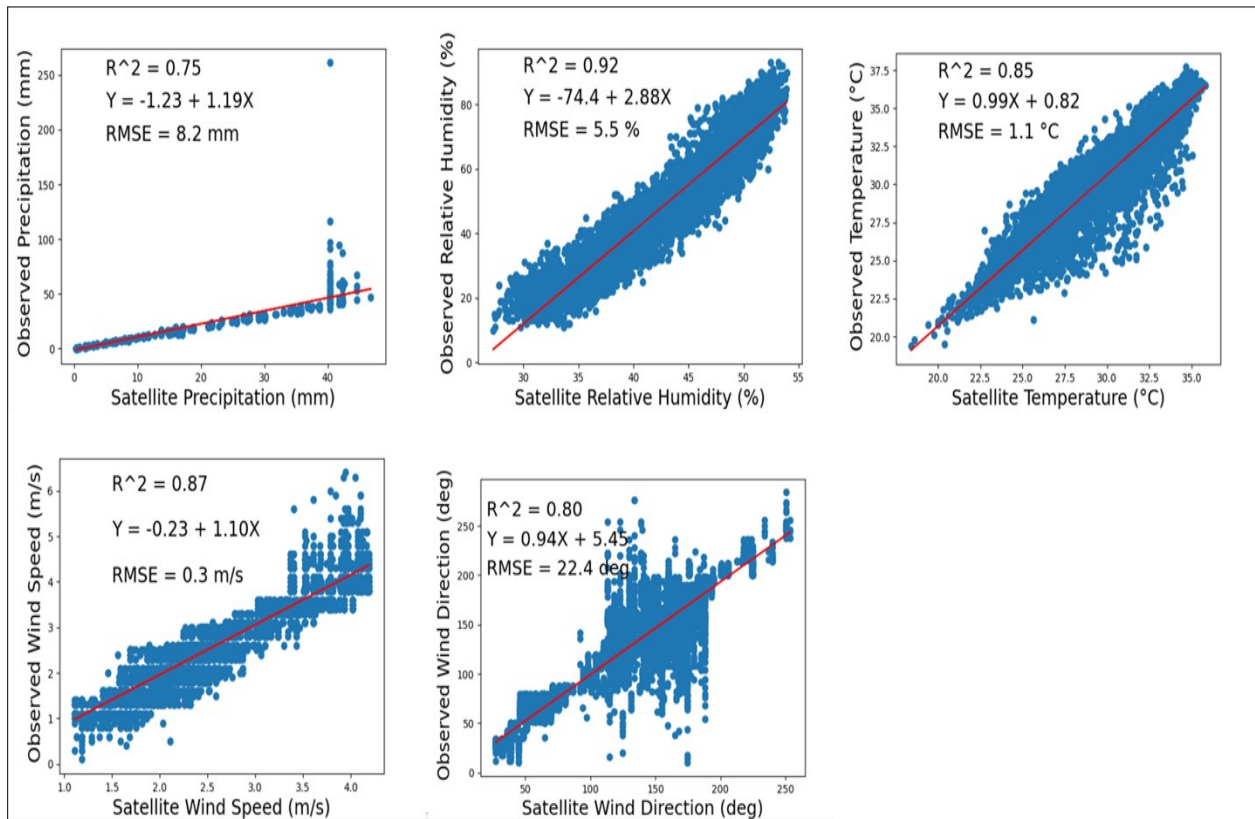

**Figure S1:** Simple linear models for correcting satellite data in Ouagadougou

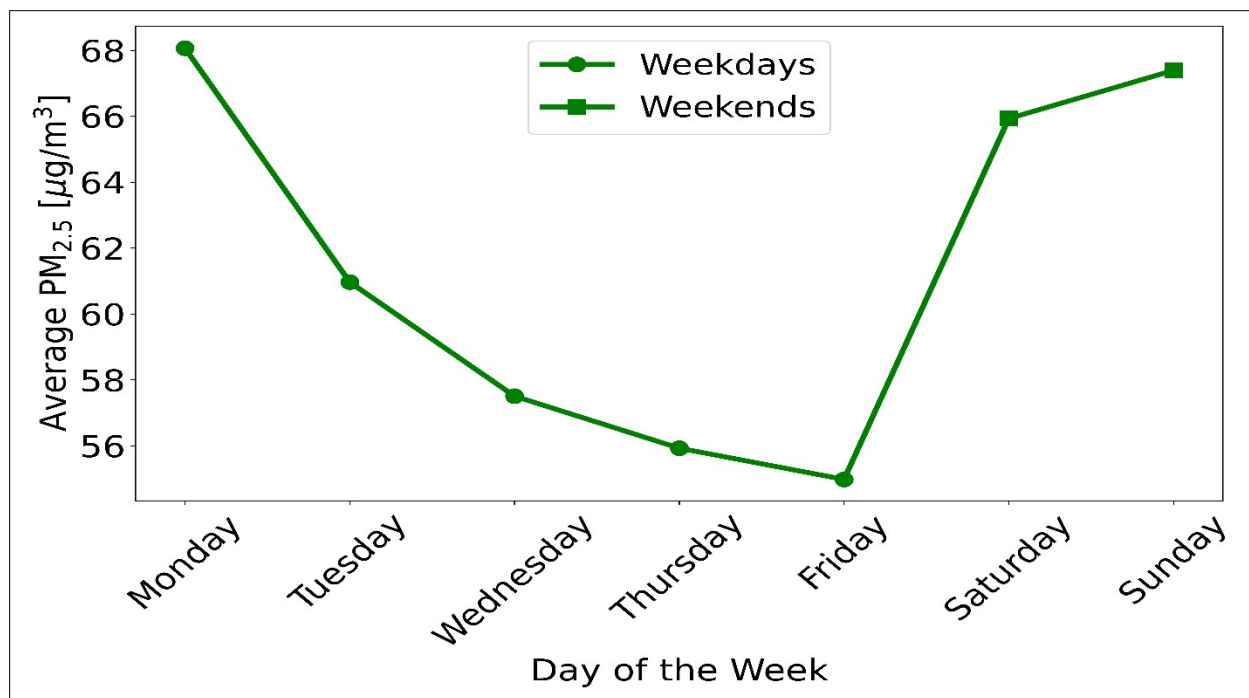

**Figure S2:** Temporal changes of PM<sub>2.5</sub> on weekdays and weekends

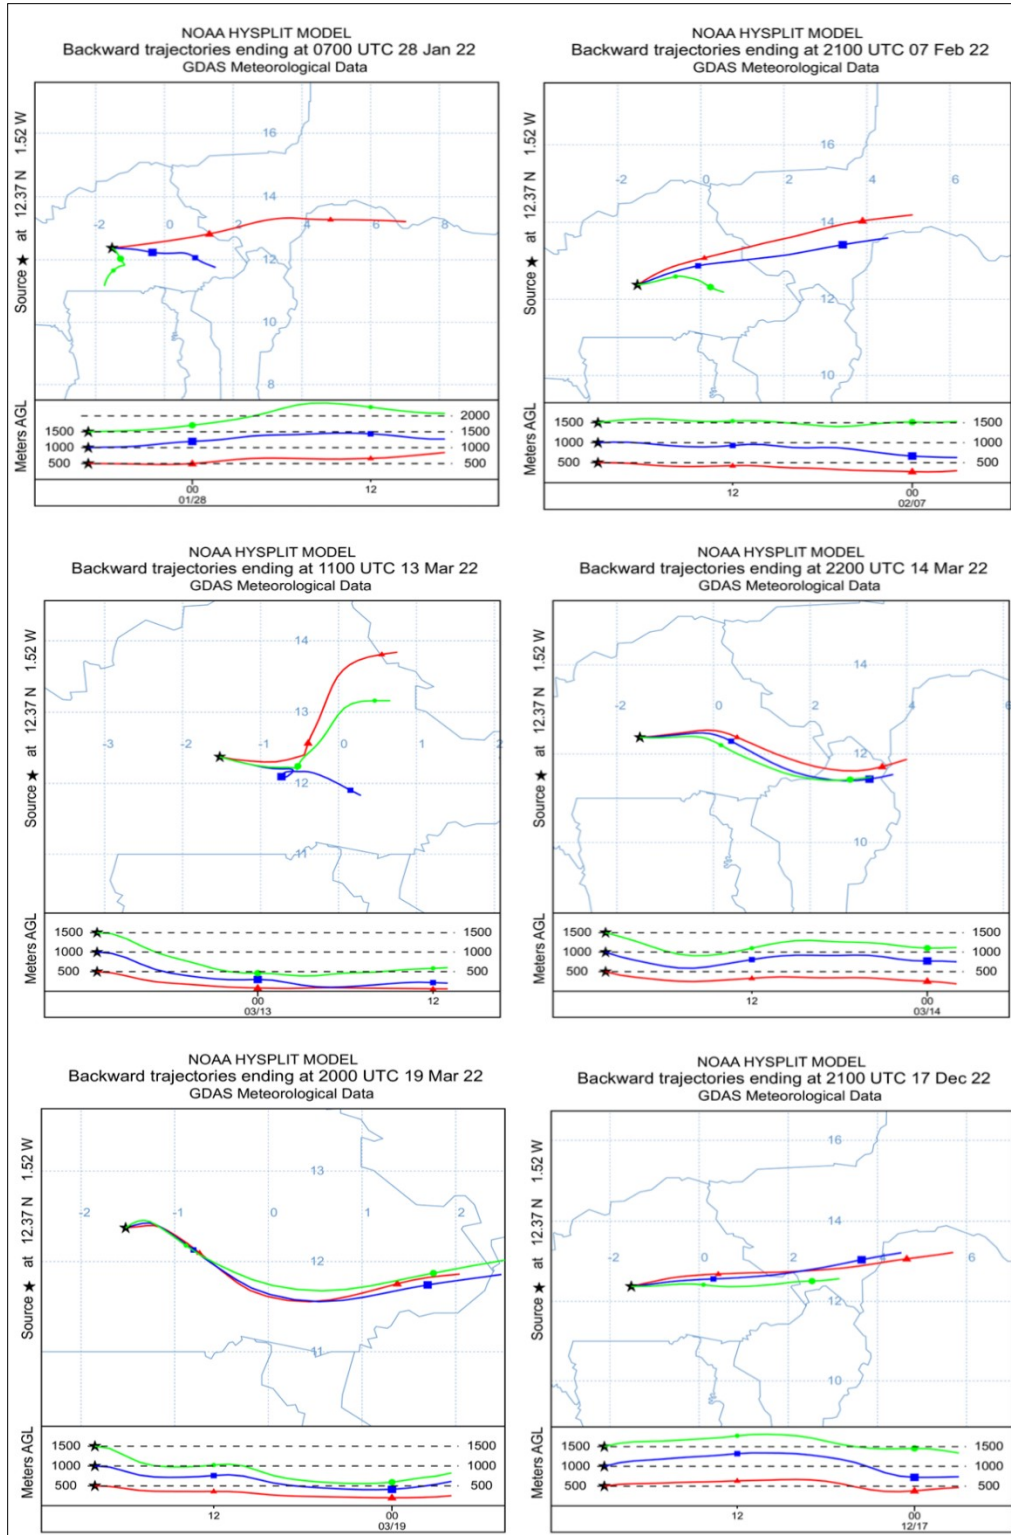

**Figure S3:** Potential source regions and contributions to PM<sub>2.5</sub> from Trajstat model (NOAA HYSPLIT model) for extremely polluted days in Ouagadougou at three receptor heights 500 m (red), 1000 m (blue), and 1500 m (green).

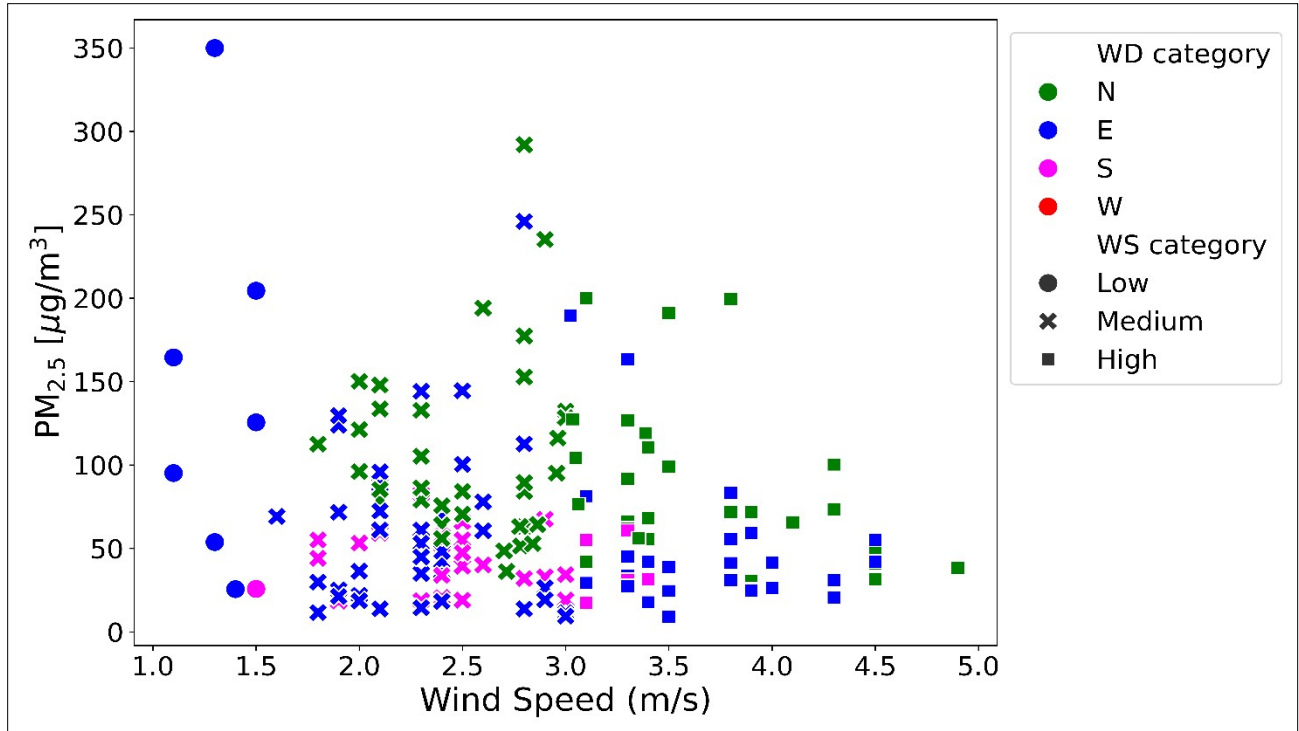

**Figure S4:** Conditional bivariate analysis of the relationship between wind speed, wind direction, and PM<sub>2.5</sub> concentrations

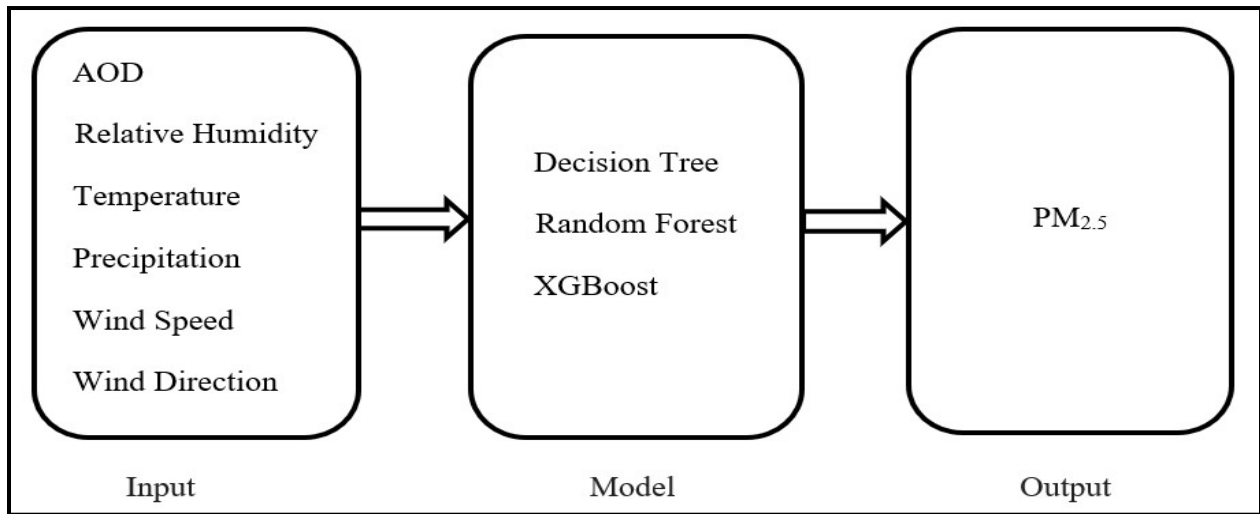

**Figure S5:** Schematic of AOD and weather parameters as model input

**Table S4:** Models and hyperparameters set to obtain optimal performance.

| Model         | Hyperparameters set |
|---------------|---------------------|
| Decision tree | ccp_alpha = 0.01    |

---

|               |                                                                                                                                                                                                                                                                                                                                                                                                                                                                                                                                                                                                                                                                                                                                                                                                                                                                                                                                                                                                                                                                                                                                   |
|---------------|-----------------------------------------------------------------------------------------------------------------------------------------------------------------------------------------------------------------------------------------------------------------------------------------------------------------------------------------------------------------------------------------------------------------------------------------------------------------------------------------------------------------------------------------------------------------------------------------------------------------------------------------------------------------------------------------------------------------------------------------------------------------------------------------------------------------------------------------------------------------------------------------------------------------------------------------------------------------------------------------------------------------------------------------------------------------------------------------------------------------------------------|
|               | <code>max_depth = 5</code><br><code>max_features = 'sqrt'</code><br><code>min_samples_split = 2</code><br><code>random_state = 42</code><br><code>splitter = 'best'</code>                                                                                                                                                                                                                                                                                                                                                                                                                                                                                                                                                                                                                                                                                                                                                                                                                                                                                                                                                        |
| Random forest | <code>max_depth = 7</code><br><code>n_estimators = 50</code><br><code>max_features = 'sqrt'</code><br><code>ccp_alpha = 0.01</code><br><code>min_samples_split = 4</code><br><code>min_samples_leaf = 2</code>                                                                                                                                                                                                                                                                                                                                                                                                                                                                                                                                                                                                                                                                                                                                                                                                                                                                                                                    |
| XGBoost       | <code>base_score = 0.5</code><br><code>booster = gbtree</code><br><code>callbacks = None</code><br><code>colsample_bylevel = None</code><br><code>colsample_bynode = None</code><br><code>colsample_bytree = 0.5</code><br><code>early_stopping_rounds = None</code><br><code>enable_categorical = False</code><br><code>eval_metric = None</code><br><code>feature_types = None</code><br><code>gamma = 0.4</code><br><code>gpu_id = None</code><br><code>grow_policy = None</code><br><code>importance_type = None</code><br><code>interaction_constraints = None</code><br><code>learning_rate = 0.1</code><br><code>max_bin = None</code><br><code>max_cat_threshold = None</code><br><code>max_cat_to_onehot = None</code><br><code>max_delta_step = None</code><br><code>max_depth = 7</code><br><code>max_leaves = None</code><br><code>min_child_weight = 7</code><br><code>missing = nan</code><br><code>monotone_constraints = None</code><br><code>n_estimators = 100</code><br><code>n_jobs = None</code><br><code>num_parallel_tree = None</code><br><code>predictor = None</code><br><code>random_state = 42</code> |

---

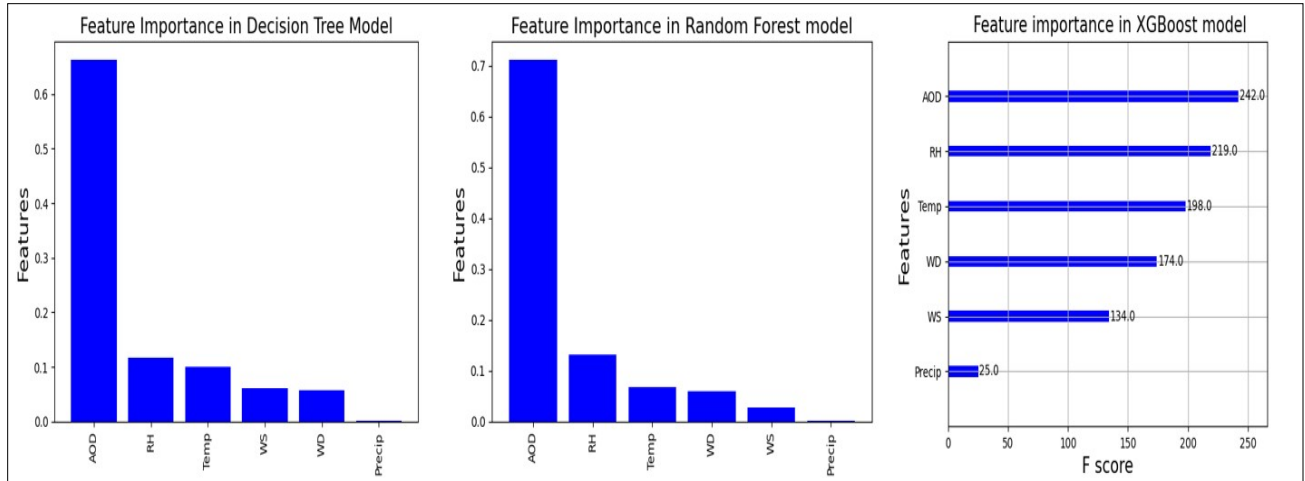

**Figure S6:** Feature importance in the DT, RF, and XGBoost models

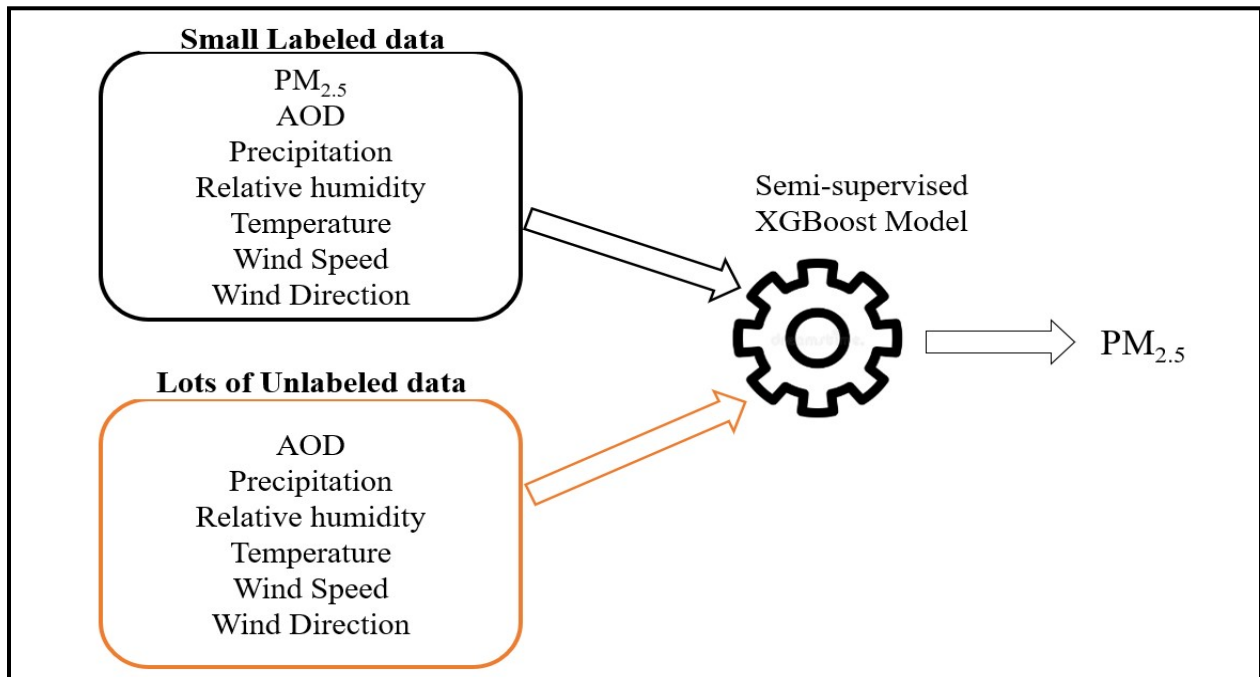

**Figure S7:** Schematic of semi-supervised XGBoost

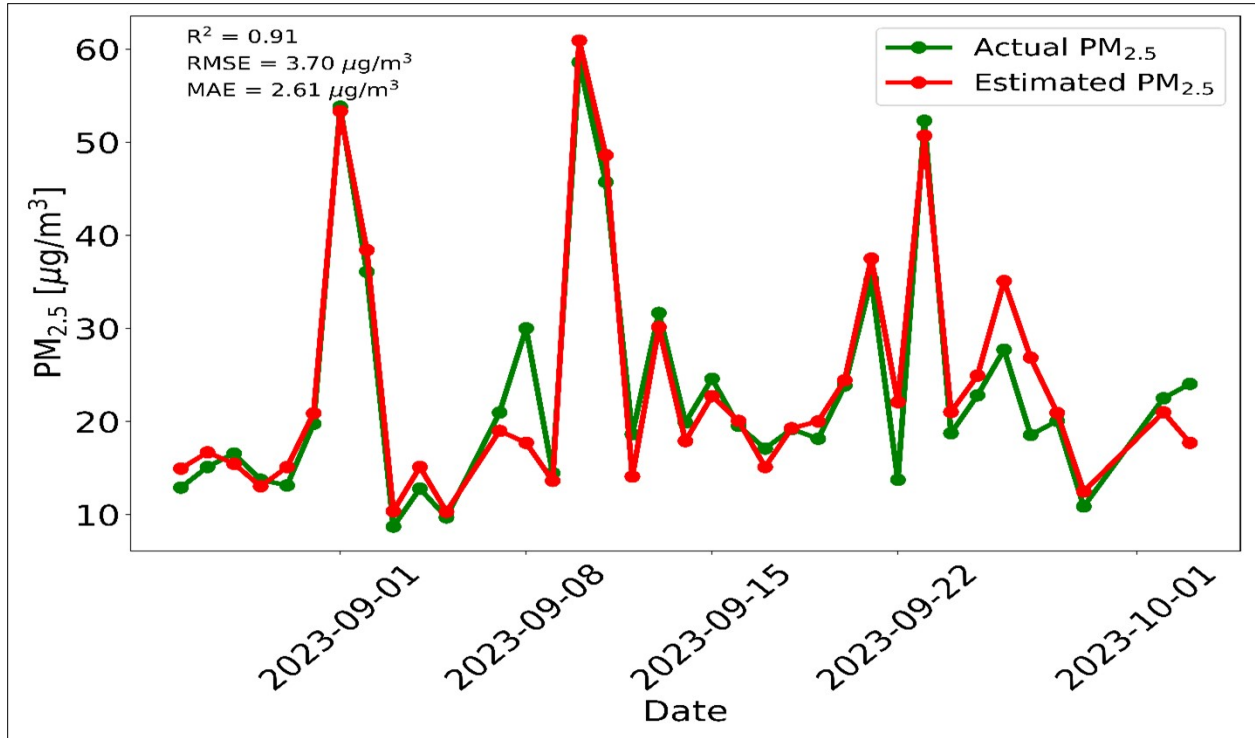

**Figure S8:** Validation of the semi-supervised XGBoost model using an independent dataset (TEOM 1400a, a federal equivalent method gravimetric PM<sub>2.5</sub> monitor located at Université Joseph Ki-Zerbo in Ouagadougou)
